# Supplementary material
Source: publisher figshare collection journal article supplement (https://acs.figshare.com/ndownloader/files/26293402)
Supplement: Supplementary file 1 [file 26293402]

## Supporting information

### Green Thermoplastic Vulcanizates Based on Silicone Rubber and Poly(butylene succinate) via In Situ Interfacial Compatibilization

*Yufeng Liang<sup>a,b</sup>, Haoyu Wang<sup>a,b</sup>, Jiahuan Li<sup>a,b</sup>, Shaowei Wu<sup>a,b</sup>, Wenchi Han<sup>a,b</sup>, Hailan*

*Kang<sup>a,b\*</sup>, Qinghong Fang<sup>a,b</sup>*

<sup>a</sup> Key Laboratory for Rubber Elastomer of Liaoning Province, Shenyang University of Chemical Technology, 110142, Shenyang, China

<sup>b</sup> College of Materials Science and Engineering, Shenyang University of Chemical Technology, 110142, Shenyang, China

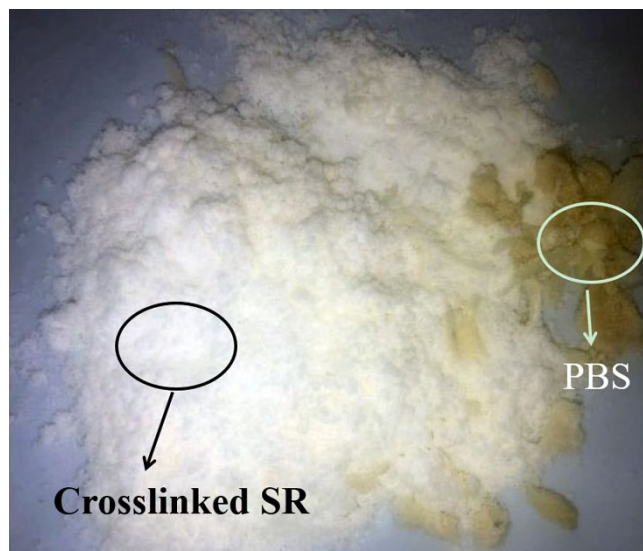

**Figure S1.** Digital photograph of SR/PBS TPV (SR/PBS=70/30).

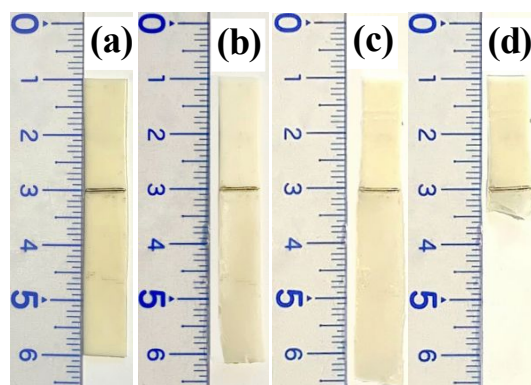

**Figure S2.** Digital photographs of FSR/PBS-70 immersed in DCM at 35°C for various time durations: (a) 0 min, (b) 5min, (c) 10 min, and (d) 20 min.

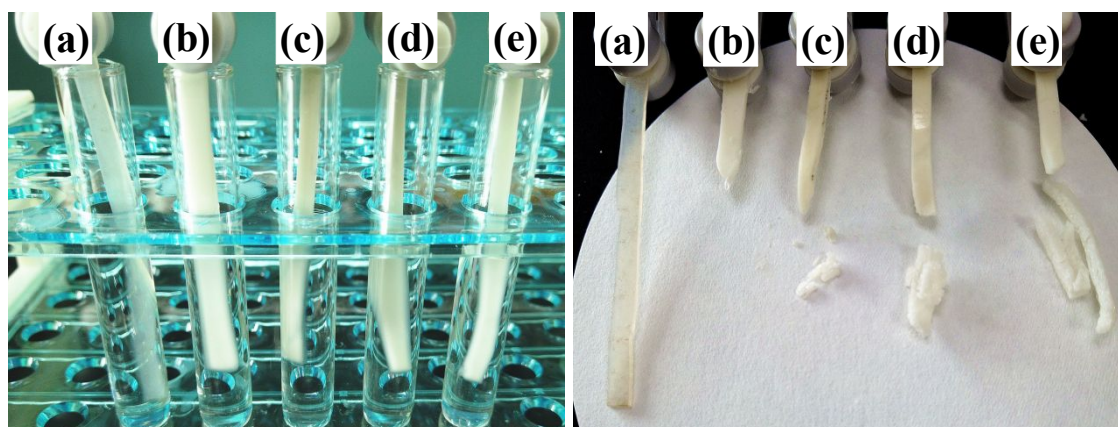

**Figure S3.** Digital photographs of FSR/PBS TPVs immersed in DCM before (left) and after (right) 20 min at 35°C: (a) FSR; (b) FSR/PBS-50; (c) FSR/PBS-60; (d) FSR/PBS-70; (e) FSR/PBS-80.

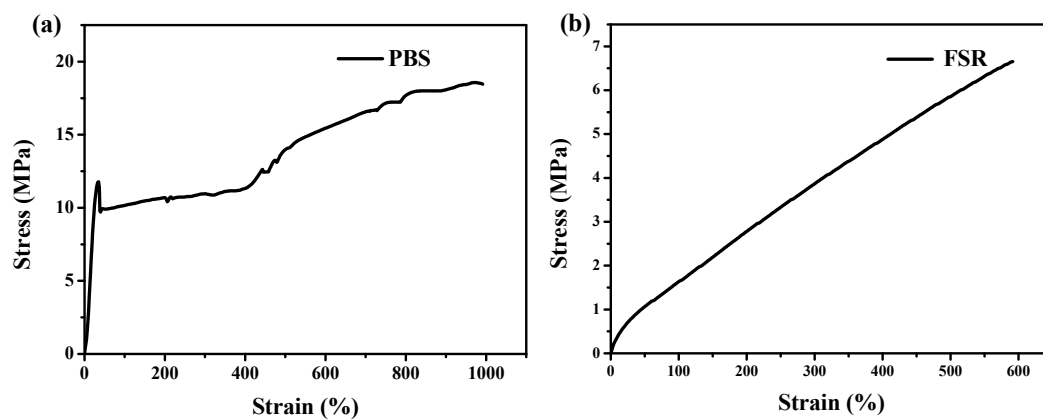

**Figure S4.** The stress-strain curves of (a) PBS and (b) FSR.

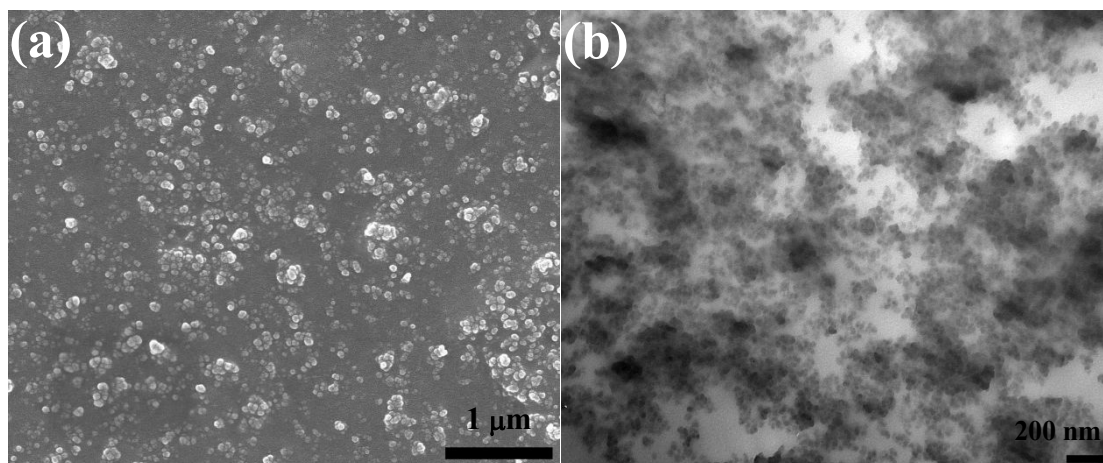

**Figure S5.** Microscopy images of FSR: (a) SEM, (b) TEM.
